# Supplementary material
Source: publisher site journal article supplement (https://www.spandidos-publications.com/3196/downloadSupplementary)
Supplement: Supplementary file 1 [file downloadSupplementary]

## Sheet: GO term-upregulation
Table SIV. Enrichment of target genes of upregulated microRNAs based on GO terms.
Pathway ID	Pathway description	Observed gene count	False discovery rate	Matching proteins in network (IDs)	Matching proteins in network (labels)
GO.0001666	response to hypoxia	7	6.57e-06	ENSRNOP00000014175,ENSRNOP00000018990,ENSRNOP00000023965,ENSRNOP00000025794,ENSRNOP00000054372,ENSRNOP00000060764,ENSRNOP00000062321	Agtr1b,Arnt,Camk2g,Mmp9,Myocd,Nox4,Sod2
GO.0001101	response to acid chemical	6	0.000143	ENSRNOP00000005746,ENSRNOP00000019652,ENSRNOP00000023965,ENSRNOP00000025794,ENSRNOP00000050057,ENSRNOP00000065222	Cebpb,Cpt1a,Mmp9,Sod2,Srebf1,Timp3
GO.0008285	negative regulation of cell proliferation	6	0.000143	ENSRNOP00000013585,ENSRNOP00000016221,ENSRNOP00000018990,ENSRNOP00000023965,ENSRNOP00000025794,ENSRNOP00000065222	Cebpb,Mmp9,Nox4,Pdcd10,Sod2,Tsc2
GO.0070482	response to oxygen levels	6	0.000171	ENSRNOP00000014175,ENSRNOP00000018990,ENSRNOP00000023965,ENSRNOP00000054372,ENSRNOP00000060764,ENSRNOP00000062321	Agtr1b,Arnt,Camk2g,Mmp9,Myocd,Nox4
GO.0072358	cardiovascular system development	6	0.000171	ENSRNOP00000013585,ENSRNOP00000014175,ENSRNOP00000018990,ENSRNOP00000023965,ENSRNOP00000025794,ENSRNOP00000054372	Agtr1b,Mmp9,Myocd,Nox4,Pdcd10,Sod2
GO.0072359	circulatory system development	6	0.000171	ENSRNOP00000013585,ENSRNOP00000014175,ENSRNOP00000018990,ENSRNOP00000023965,ENSRNOP00000025794,ENSRNOP00000054372	Agtr1b,Mmp9,Myocd,Nox4,Pdcd10,Sod2
GO.0097193	intrinsic apoptotic signaling pathway	4	0.000184	ENSRNOP00000013585,ENSRNOP00000025794,ENSRNOP00000039006,ENSRNOP00000065222	Bcl2l11,Cebpb,Pdcd10,Sod2
GO.0065008	regulation of biological quality	9	0.000607	ENSRNOP00000013585,ENSRNOP00000014175,ENSRNOP00000016221,ENSRNOP00000018990,ENSRNOP00000023965,ENSRNOP00000025794,ENSRNOP00000039006,ENSRNOP00000050057,ENSRNOP00000062321	Agtr1b,Bcl2l11,Camk2g,Mmp9,Nox4,Pdcd10,Sod2,Srebf1,Tsc2
GO.0006950	response to stress	9	0.000628	ENSRNOP00000005746,ENSRNOP00000013585,ENSRNOP00000018990,ENSRNOP00000023965,ENSRNOP00000039006,ENSRNOP00000050057,ENSRNOP00000054372,ENSRNOP00000060764,ENSRNOP00000062321	Arnt,Bcl2l11,Camk2g,Mmp9,Myocd,Nox4,Pdcd10,Srebf1,Timp3
GO.1901700	response to oxygen-containing compound	8	0.000628	ENSRNOP00000005746,ENSRNOP00000013585,ENSRNOP00000014175,ENSRNOP00000019652,ENSRNOP00000023965,ENSRNOP00000025794,ENSRNOP00000050057,ENSRNOP00000065222	Agtr1b,Cebpb,Cpt1a,Mmp9,Pdcd10,Sod2,Srebf1,Timp3
GO.0033993	response to lipid	7	0.000823	ENSRNOP00000005746,ENSRNOP00000014175,ENSRNOP00000019652,ENSRNOP00000023965,ENSRNOP00000025794,ENSRNOP00000050057,ENSRNOP00000065222	Agtr1b,Cebpb,Cpt1a,Mmp9,Sod2,Srebf1,Timp3
GO.0009628	response to abiotic stimulus	7	0.000824	ENSRNOP00000005746,ENSRNOP00000014175,ENSRNOP00000018990,ENSRNOP00000023965,ENSRNOP00000054372,ENSRNOP00000060764,ENSRNOP00000062321	Agtr1b,Arnt,Camk2g,Mmp9,Myocd,Nox4,Timp3
GO.1901701	cellular response to oxygen-containing compound	6	0.00137	ENSRNOP00000013585,ENSRNOP00000014175,ENSRNOP00000019652,ENSRNOP00000023965,ENSRNOP00000025794,ENSRNOP00000065222	Agtr1b,Cebpb,Cpt1a,Mmp9,Pdcd10,Sod2
GO.0007568	aging	5	0.00143	ENSRNOP00000005746,ENSRNOP00000018990,ENSRNOP00000023965,ENSRNOP00000025794,ENSRNOP00000050057	Mmp9,Nox4,Sod2,Srebf1,Timp3
GO.0048731	system development	9	0.00162	ENSRNOP00000005746,ENSRNOP00000013585,ENSRNOP00000014175,ENSRNOP00000018990,ENSRNOP00000023965,ENSRNOP00000025794,ENSRNOP00000050057,ENSRNOP00000054372,ENSRNOP00000062321	Agtr1b,Camk2g,Mmp9,Myocd,Nox4,Pdcd10,Sod2,Srebf1,Timp3
GO.0042221	response to chemical	9	0.00268	ENSRNOP00000005746,ENSRNOP00000013585,ENSRNOP00000014175,ENSRNOP00000019652,ENSRNOP00000023965,ENSRNOP00000050057,ENSRNOP00000054372,ENSRNOP00000060764,ENSRNOP00000065222	Agtr1b,Arnt,Cebpb,Cpt1a,Mmp9,Myocd,Pdcd10,Srebf1,Timp3
GO.0009888	tissue development	6	0.00333	ENSRNOP00000005746,ENSRNOP00000013585,ENSRNOP00000018990,ENSRNOP00000019652,ENSRNOP00000054372,ENSRNOP00000065222	Cebpb,Cpt1a,Myocd,Nox4,Pdcd10,Timp3
GO.0007275	multicellular organismal development	9	0.00388	ENSRNOP00000005746,ENSRNOP00000013585,ENSRNOP00000014175,ENSRNOP00000018990,ENSRNOP00000023965,ENSRNOP00000025794,ENSRNOP00000050057,ENSRNOP00000054372,ENSRNOP00000062321	Agtr1b,Camk2g,Mmp9,Myocd,Nox4,Pdcd10,Sod2,Srebf1,Timp3
GO.0048856	anatomical structure development	9	0.00388	ENSRNOP00000005746,ENSRNOP00000013585,ENSRNOP00000014175,ENSRNOP00000019652,ENSRNOP00000023965,ENSRNOP00000025794,ENSRNOP00000050057,ENSRNOP00000054372,ENSRNOP00000062321	Agtr1b,Camk2g,Cpt1a,Mmp9,Myocd,Pdcd10,Sod2,Srebf1,Timp3
GO.0051246	regulation of protein metabolic process	7	0.00448	ENSRNOP00000005746,ENSRNOP00000016221,ENSRNOP00000018990,ENSRNOP00000039006,ENSRNOP00000050057,ENSRNOP00000054372,ENSRNOP00000065222	Bcl2l11,Cebpb,Myocd,Nox4,Srebf1,Timp3,Tsc2
GO.0010033	response to organic substance	8	0.00465	ENSRNOP00000005746,ENSRNOP00000014175,ENSRNOP00000019652,ENSRNOP00000023965,ENSRNOP00000025794,ENSRNOP00000050057,ENSRNOP00000054372,ENSRNOP00000065222	Agtr1b,Cebpb,Cpt1a,Mmp9,Myocd,Sod2,Srebf1,Timp3
GO.0007507	heart development	4	0.00517	ENSRNOP00000018990,ENSRNOP00000023965,ENSRNOP00000025794,ENSRNOP00000054372	Mmp9,Myocd,Nox4,Sod2
GO.0023051	regulation of signaling	7	0.00662	ENSRNOP00000016221,ENSRNOP00000018990,ENSRNOP00000019652,ENSRNOP00000023965,ENSRNOP00000039006,ENSRNOP00000050057,ENSRNOP00000062321	Bcl2l11,Camk2g,Cpt1a,Mmp9,Nox4,Srebf1,Tsc2
GO.0010646	regulation of cell communication	7	0.00692	ENSRNOP00000016221,ENSRNOP00000018990,ENSRNOP00000019652,ENSRNOP00000023965,ENSRNOP00000039006,ENSRNOP00000050057,ENSRNOP00000062321	Bcl2l11,Camk2g,Cpt1a,Mmp9,Nox4,Srebf1,Tsc2
GO.0007165	signal transduction	8	0.00741	ENSRNOP00000013585,ENSRNOP00000014175,ENSRNOP00000016221,ENSRNOP00000025794,ENSRNOP00000039006,ENSRNOP00000050057,ENSRNOP00000060764,ENSRNOP00000065222	Agtr1b,Arnt,Bcl2l11,Cebpb,Pdcd10,Sod2,Srebf1,Tsc2
GO.0008631	intrinsic apoptotic signaling pathway in response to oxidative stress	2	0.00741	ENSRNOP00000013585,ENSRNOP00000025794	Pdcd10,Sod2
GO.0031667	response to nutrient levels	5	0.00741	ENSRNOP00000005746,ENSRNOP00000014175,ENSRNOP00000023965,ENSRNOP00000025794,ENSRNOP00000050057	Agtr1b,Mmp9,Sod2,Srebf1,Timp3
GO.0036473	cell death in response to oxidative stress	2	0.00741	ENSRNOP00000013585,ENSRNOP00000025794	Pdcd10,Sod2
GO.0042554	superoxide anion generation	2	0.00741	ENSRNOP00000018990,ENSRNOP00000025794	Nox4,Sod2
GO.0014070	response to organic cyclic compound	6	0.0104	ENSRNOP00000005746,ENSRNOP00000014175,ENSRNOP00000018990,ENSRNOP00000019652,ENSRNOP00000023965,ENSRNOP00000050057	Agtr1b,Cpt1a,Mmp9,Nox4,Srebf1,Timp3
GO.0042493	response to drug	5	0.0111	ENSRNOP00000014175,ENSRNOP00000019652,ENSRNOP00000023965,ENSRNOP00000025794,ENSRNOP00000050057	Agtr1b,Cpt1a,Mmp9,Sod2,Srebf1
GO.0044700	single organism signaling	8	0.0111	ENSRNOP00000013585,ENSRNOP00000014175,ENSRNOP00000016221,ENSRNOP00000025794,ENSRNOP00000039006,ENSRNOP00000050057,ENSRNOP00000060764,ENSRNOP00000065222	Agtr1b,Arnt,Bcl2l11,Cebpb,Pdcd10,Sod2,Srebf1,Tsc2
GO.0007584	response to nutrient	4	0.0113	ENSRNOP00000005746,ENSRNOP00000014175,ENSRNOP00000023965,ENSRNOP00000025794	Agtr1b,Mmp9,Sod2,Timp3
GO.0071310	cellular response to organic substance	6	0.0124	ENSRNOP00000014175,ENSRNOP00000019652,ENSRNOP00000023965,ENSRNOP00000025794,ENSRNOP00000054372,ENSRNOP00000065222	Agtr1b,Cebpb,Cpt1a,Mmp9,Myocd,Sod2
GO.0007154	cell communication	8	0.0138	ENSRNOP00000013585,ENSRNOP00000014175,ENSRNOP00000016221,ENSRNOP00000023965,ENSRNOP00000025794,ENSRNOP00000039006,ENSRNOP00000060764,ENSRNOP00000065222	Agtr1b,Arnt,Bcl2l11,Cebpb,Mmp9,Pdcd10,Sod2,Tsc2
GO.0048066	developmental pigmentation	2	0.0138	ENSRNOP00000025794,ENSRNOP00000039006	Bcl2l11,Sod2
GO.0050793	regulation of developmental process	6	0.0138	ENSRNOP00000013585,ENSRNOP00000014175,ENSRNOP00000023965,ENSRNOP00000025794,ENSRNOP00000039006,ENSRNOP00000054372	Agtr1b,Bcl2l11,Mmp9,Myocd,Pdcd10,Sod2
GO.0019048	modulation by virus of host morphology or physiology	2	0.0142	ENSRNOP00000023965,ENSRNOP00000039006	Bcl2l11,Mmp9
GO.0048147	negative regulation of fibroblast proliferation	2	0.0142	ENSRNOP00000023965,ENSRNOP00000025794	Mmp9,Sod2
GO.0050790	regulation of catalytic activity	6	0.0142	ENSRNOP00000005746,ENSRNOP00000013585,ENSRNOP00000016221,ENSRNOP00000018990,ENSRNOP00000025794,ENSRNOP00000039006	Bcl2l11,Nox4,Pdcd10,Sod2,Timp3,Tsc2
GO.0080090	regulation of primary metabolic process	8	0.0142	ENSRNOP00000005746,ENSRNOP00000016221,ENSRNOP00000018990,ENSRNOP00000019652,ENSRNOP00000025794,ENSRNOP00000039006,ENSRNOP00000054372,ENSRNOP00000060764	Arnt,Bcl2l11,Cpt1a,Myocd,Nox4,Sod2,Timp3,Tsc2
GO.0009605	response to external stimulus	6	0.0165	ENSRNOP00000005746,ENSRNOP00000014175,ENSRNOP00000023965,ENSRNOP00000025794,ENSRNOP00000039006,ENSRNOP00000050057	Agtr1b,Bcl2l11,Mmp9,Sod2,Srebf1,Timp3
GO.0051259	protein oligomerization	4	0.0166	ENSRNOP00000016221,ENSRNOP00000019652,ENSRNOP00000023965,ENSRNOP00000025794	Cpt1a,Mmp9,Sod2,Tsc2
GO.0071396	cellular response to lipid	4	0.0166	ENSRNOP00000014175,ENSRNOP00000019652,ENSRNOP00000023965,ENSRNOP00000050057	Agtr1b,Cpt1a,Mmp9,Srebf1
GO.0032268	regulation of cellular protein metabolic process	6	0.0173	ENSRNOP00000005746,ENSRNOP00000016221,ENSRNOP00000018990,ENSRNOP00000039006,ENSRNOP00000050057,ENSRNOP00000054372	Bcl2l11,Myocd,Nox4,Srebf1,Timp3,Tsc2
GO.0071229	cellular response to acid chemical	3	0.0196	ENSRNOP00000019652,ENSRNOP00000050057,ENSRNOP00000065222	Cebpb,Cpt1a,Srebf1
GO.1901342	regulation of vasculature development	3	0.0196	ENSRNOP00000013585,ENSRNOP00000023965,ENSRNOP00000054372	Mmp9,Myocd,Pdcd10
GO.0043405	regulation of MAP kinase activity	3	0.0204	ENSRNOP00000013585,ENSRNOP00000016221,ENSRNOP00000018990	Nox4,Pdcd10,Tsc2
GO.0042127	regulation of cell proliferation	5	0.0222	ENSRNOP00000016221,ENSRNOP00000018990,ENSRNOP00000023965,ENSRNOP00000025794,ENSRNOP00000065222	Cebpb,Mmp9,Nox4,Sod2,Tsc2
GO.0071704	organic substance metabolic process	10	0.0223	ENSRNOP00000018990,ENSRNOP00000019652,ENSRNOP00000023965,ENSRNOP00000025794,ENSRNOP00000039006,ENSRNOP00000050057,ENSRNOP00000054372,ENSRNOP00000060764,ENSRNOP00000062321,ENSRNOP00000065222	Arnt,Bcl2l11,Camk2g,Cebpb,Cpt1a,Mmp9,Myocd,Nox4,Sod2,Srebf1
GO.0001822	kidney development	3	0.0235	ENSRNOP00000014175,ENSRNOP00000023965,ENSRNOP00000039006	Agtr1b,Bcl2l11,Mmp9
GO.0072001	renal system development	3	0.0237	ENSRNOP00000014175,ENSRNOP00000023965,ENSRNOP00000039006	Agtr1b,Bcl2l11,Mmp9
GO.0070887	cellular response to chemical stimulus	6	0.0247	ENSRNOP00000013585,ENSRNOP00000014175,ENSRNOP00000019652,ENSRNOP00000023965,ENSRNOP00000054372,ENSRNOP00000065222	Agtr1b,Cebpb,Cpt1a,Mmp9,Myocd,Pdcd10
GO.0009791	post-embryonic development	2	0.0258	ENSRNOP00000025794,ENSRNOP00000039006	Bcl2l11,Sod2
GO.0042981	regulation of apoptotic process	5	0.0258	ENSRNOP00000013585,ENSRNOP00000018990,ENSRNOP00000025794,ENSRNOP00000039006,ENSRNOP00000065222	Bcl2l11,Cebpb,Nox4,Pdcd10,Sod2
GO.0009719	response to endogenous stimulus	6	0.0266	ENSRNOP00000005746,ENSRNOP00000014175,ENSRNOP00000018990,ENSRNOP00000023965,ENSRNOP00000050057,ENSRNOP00000065222	Agtr1b,Cebpb,Mmp9,Nox4,Srebf1,Timp3
GO.0033273	response to vitamin	3	0.0267	ENSRNOP00000005746,ENSRNOP00000023965,ENSRNOP00000025794	Mmp9,Sod2,Timp3
GO.0003044	regulation of systemic arterial blood pressure mediated by a chemical signal	2	0.0281	ENSRNOP00000014175,ENSRNOP00000025794	Agtr1b,Sod2
GO.0010243	response to organonitrogen compound	5	0.0281	ENSRNOP00000005746,ENSRNOP00000018990,ENSRNOP00000023965,ENSRNOP00000050057,ENSRNOP00000065222	Cebpb,Mmp9,Nox4,Srebf1,Timp3
GO.0044767	single-organism developmental process	8	0.0283	ENSRNOP00000005746,ENSRNOP00000013585,ENSRNOP00000014175,ENSRNOP00000019652,ENSRNOP00000023965,ENSRNOP00000050057,ENSRNOP00000054372,ENSRNOP00000062321	Agtr1b,Camk2g,Cpt1a,Mmp9,Myocd,Pdcd10,Srebf1,Timp3
GO.0001655	urogenital system development	3	0.0287	ENSRNOP00000014175,ENSRNOP00000023965,ENSRNOP00000039006	Agtr1b,Bcl2l11,Mmp9
GO.2000026	regulation of multicellular organismal development	5	0.0299	ENSRNOP00000013585,ENSRNOP00000014175,ENSRNOP00000023965,ENSRNOP00000054372,ENSRNOP00000065222	Agtr1b,Cebpb,Mmp9,Myocd,Pdcd10
GO.0008630	intrinsic apoptotic signaling pathway in response to DNA damage	2	0.0317	ENSRNOP00000025794,ENSRNOP00000039006	Bcl2l11,Sod2
GO.0050896	response to stimulus	9	0.0317	ENSRNOP00000005746,ENSRNOP00000013585,ENSRNOP00000016221,ENSRNOP00000019652,ENSRNOP00000023965,ENSRNOP00000039006,ENSRNOP00000050057,ENSRNOP00000054372,ENSRNOP00000062321	Bcl2l11,Camk2g,Cpt1a,Mmp9,Myocd,Pdcd10,Srebf1,Timp3,Tsc2
GO.0051716	cellular response to stimulus	8	0.0317	ENSRNOP00000013585,ENSRNOP00000014175,ENSRNOP00000016221,ENSRNOP00000019652,ENSRNOP00000023965,ENSRNOP00000039006,ENSRNOP00000054372,ENSRNOP00000060764	Agtr1b,Arnt,Bcl2l11,Cpt1a,Mmp9,Myocd,Pdcd10,Tsc2
GO.0048513	organ development	6	0.038	ENSRNOP00000014175,ENSRNOP00000018990,ENSRNOP00000023965,ENSRNOP00000025794,ENSRNOP00000050057,ENSRNOP00000054372	Agtr1b,Mmp9,Myocd,Nox4,Sod2,Srebf1
GO.0044707	single-multicellular organism process	8	0.0387	ENSRNOP00000005746,ENSRNOP00000013585,ENSRNOP00000018990,ENSRNOP00000023965,ENSRNOP00000025794,ENSRNOP00000050057,ENSRNOP00000054372,ENSRNOP00000062321	Camk2g,Mmp9,Myocd,Nox4,Pdcd10,Sod2,Srebf1,Timp3
GO.0034284	response to monosaccharide	3	0.0397	ENSRNOP00000018990,ENSRNOP00000025794,ENSRNOP00000050057	Nox4,Sod2,Srebf1
GO.0035902	response to immobilization stress	2	0.0402	ENSRNOP00000014175,ENSRNOP00000025794	Agtr1b,Sod2
GO.0008637	apoptotic mitochondrial changes	2	0.0425	ENSRNOP00000025794,ENSRNOP00000039006	Bcl2l11,Sod2
GO.0033043	regulation of organelle organization	4	0.0436	ENSRNOP00000018990,ENSRNOP00000039006,ENSRNOP00000050057,ENSRNOP00000054372	Bcl2l11,Myocd,Nox4,Srebf1
GO.0006915	apoptotic process	4	0.0448	ENSRNOP00000013585,ENSRNOP00000025794,ENSRNOP00000039006,ENSRNOP00000065222	Bcl2l11,Cebpb,Pdcd10,Sod2
GO.0010467	gene expression	6	0.0448	ENSRNOP00000018990,ENSRNOP00000039006,ENSRNOP00000050057,ENSRNOP00000054372,ENSRNOP00000060764,ENSRNOP00000065222	Arnt,Bcl2l11,Cebpb,Myocd,Nox4,Srebf1
GO.0010605	negative regulation of macromolecule metabolic process	5	0.0448	ENSRNOP00000005746,ENSRNOP00000013585,ENSRNOP00000016221,ENSRNOP00000050057,ENSRNOP00000065222	Cebpb,Pdcd10,Srebf1,Timp3,Tsc2
GO.0022607	cellular component assembly	5	0.0448	ENSRNOP00000013585,ENSRNOP00000016221,ENSRNOP00000019652,ENSRNOP00000023965,ENSRNOP00000025794	Cpt1a,Mmp9,Pdcd10,Sod2,Tsc2
GO.0051260	protein homooligomerization	3	0.0452	ENSRNOP00000016221,ENSRNOP00000019652,ENSRNOP00000025794	Cpt1a,Sod2,Tsc2
GO.0060255	regulation of macromolecule metabolic process	7	0.0456	ENSRNOP00000005746,ENSRNOP00000016221,ENSRNOP00000018990,ENSRNOP00000025794,ENSRNOP00000039006,ENSRNOP00000054372,ENSRNOP00000060764	Arnt,Bcl2l11,Myocd,Nox4,Sod2,Timp3,Tsc2
GO.0010332	response to gamma radiation	2	0.0458	ENSRNOP00000018990,ENSRNOP00000025794	Nox4,Sod2
GO.0055007	cardiac muscle cell differentiation	2	0.0478	ENSRNOP00000018990,ENSRNOP00000054372	Myocd,Nox4
All genes targeted by upregulated microRNAs were inputted into Gene Ontology (GO; http://geneontology.org/) database and were clustered in different biological pathways.
